# Supplementary material
Source: PubMed Central journal article supplement (PMC4719627)
Supplement: JVI.02730-15_zjv999091238so1.pdf [file JVI.02730-15_zjv999091238so1.pdf]

## **Supplementary Data 1-2.**

### ***Journal of Virology***

#### **Generation of an avian/mammalian rotavirus reassortant using a helpervirus-dependent reverse genetics system**

Reimar Johne\*, Jochen Reetz, Benedikt B. Kaufer, Eva Trojnar

\*corresponding author:

R. Johne, Federal Institute for Risk Assessment, Max-Dohrn-Straße 8-10, 10589 Berlin,  
Germany,

Email: Reimar.Johne@bfr.bund.de

**Suppl. Data 1.** Primers used for identification of genome segments of RVA strains SA11 and 02V0002G3 using multiplex RT-PCR.

| genome segment (gene) | sequence (5'-3')                                                                                       | product length (SA11) | product length (02V0002G3) |
|-----------------------|--------------------------------------------------------------------------------------------------------|-----------------------|----------------------------|
| 1 (VP1)               | AAACATACRMGAGAATACGCTGA<br>TGTTTGTTCATAGTCATTAGTTTA<br>GTTAGAAATACGTGACAAAACC                          | 398 bp                | 198 bp                     |
| 2 (VP2)               | CGTAATAGATGGTATTGGAAATT<br>CACATATCTGAGCTGTCTCTTT<br>CTGGTATGTAATTGAAAATGATA                           | 399 bp                | 198 bp                     |
| 3 (VP3)               | ATTTTCATGATTATTCATATTATAC<br>GTATATAATATCATCGTCAGTA<br>TTTGAAAATTGTTTTATAGTTGG                         | 420 bp                | 196 bp                     |
| 4 (VP4)               | CCATTTGCGCAAACAGGTTATGC<br>CGAGCATATTTTTGGTCTGTGG<br>TTCATAACTGCATATAATTTTCG                           | 391 bp                | 196 bp                     |
| 5 (NSP1)              | AGATCTTGTAAGGAAAACAGAA<br>AAATGGTGTGTTCCAGAACAGAA<br>TCAGATAACTCTTTCCACACGG<br>TGGACATTCTTGTAAGTTAATA  | 399 bp                | 202 bp                     |
| 6 (VP6)               | CGMAATTTTGATACTATTAGACT<br>AGTCCGGTAACAATTGACAAGT<br>GATATAGCTACATACTCACCAAA                           | 399 bp                | 199 bp                     |
| 7 (NSP3)              | TGACAGAAAGATAGAATATGAT<br>GAATATGGGAATAGAATATGAT<br>TTTTGAGACAGTATATTGAGTAG<br>CCATTTTTTCATCCACAAATGAA | 397 bp                | 195 bp                     |
| 8 (NSP2)              | AATTC AAGAGGSATGAATTTTGA<br>ATCAAATTTGGATCGTCAGAAA<br>CTGAAATTGGTTTATCTTCGTT                           | 399 bp                | 199 bp                     |
| 9 (VP7)               | GGATATTASTYTGTATTATTATCA<br>TTAACGCCGTCAACAACATCAA<br>CTGATCTACATAGTCTACTACA                           | 411 bp                | 197 bp                     |
| 10 (NSP4)             | GAGCSCGTGCGGAAAGATGGA<br>AGATCCAGCAACTGTCTTTGTC<br>ACTCTACTTGTTCAATTTACAG                              | 391 bp                | 204 bp                     |
| 11 (NSP5)             | GGTCACAAAACGGGAGTGGGGA<br>GGCCAAAATTGATTATCAGTCA<br>ACAAATGCAGACGCTGGCGTG                              | 399 bp                | 199 bp                     |

**Suppl. Data 2.** Nucleotide and deduced amino acid exchanges identified in the cloned VP4 gene (GenBank acc.-no. KT239165) as compared to that of the published sequence of chicken RVA strain 02V0002G3 (GenBank acc.-no. FJ169856).

---

| <b>nucleotide exchange</b> | <b>amino acid exchange</b> | <b>comments</b>                                             |
|----------------------------|----------------------------|-------------------------------------------------------------|
| C90T                       | -                          | silent                                                      |
| C487A                      | H160N                      | N also in other avian strains (e.g. PO-13, AB009632)        |
| G490A                      | G161R                      | R also in other avian strains (e.g. Ch06V0661, EU486962)    |
| A521G                      | K171R                      | R also in other avian strains (e.g. Tu03V0002E10, EU486958) |
| T529G                      | L174V                      | V also in other avian strains (e.g. PO-13, AB009632)        |
| G903A                      | -                          | silent                                                      |
| A971G                      | N321S                      | S is unique in this clone                                   |
| A1008T                     | L333F                      | F in all other avian strains (e.g. Ch06V0661, EU486962)     |
| A1333G                     | R442G                      | G also in other strains (e.g. RF, U65924)                   |

---
